# Supplementary material for: A well-preserved partial scapula from Japan and the reconstruction of the triosseal canal of plotopterids
Source: PeerJ journal article supplement (doi:10.7717/peerj.5391), 2018-08-25

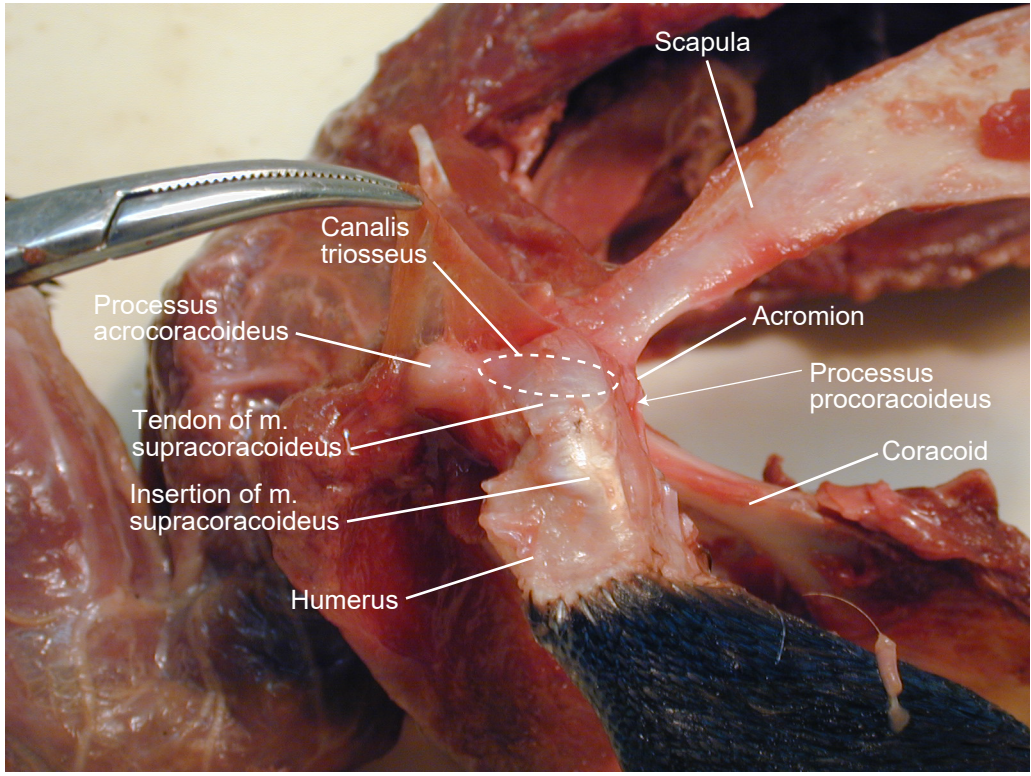

Supplement: Suppl_Figure1.pdf [file Suppl_Figure1.pdf]
